# Supplementary material for: The Performance of Serum Alpha-Fetoprotein for Detecting Early-Stage Hepatocellular Carcinoma Is Influenced by Antiviral Therapy and Serum Aspartate Aminotransferase: A Study in a Large Cohort of Hepatitis B Virus-Infected Patients
Source: MDPI journal article supplement (doi:10.3390/v14081669), 2022-07-29
Supplement: s1 [file s1]

## Supplementary Materials

### Supplementary Figures

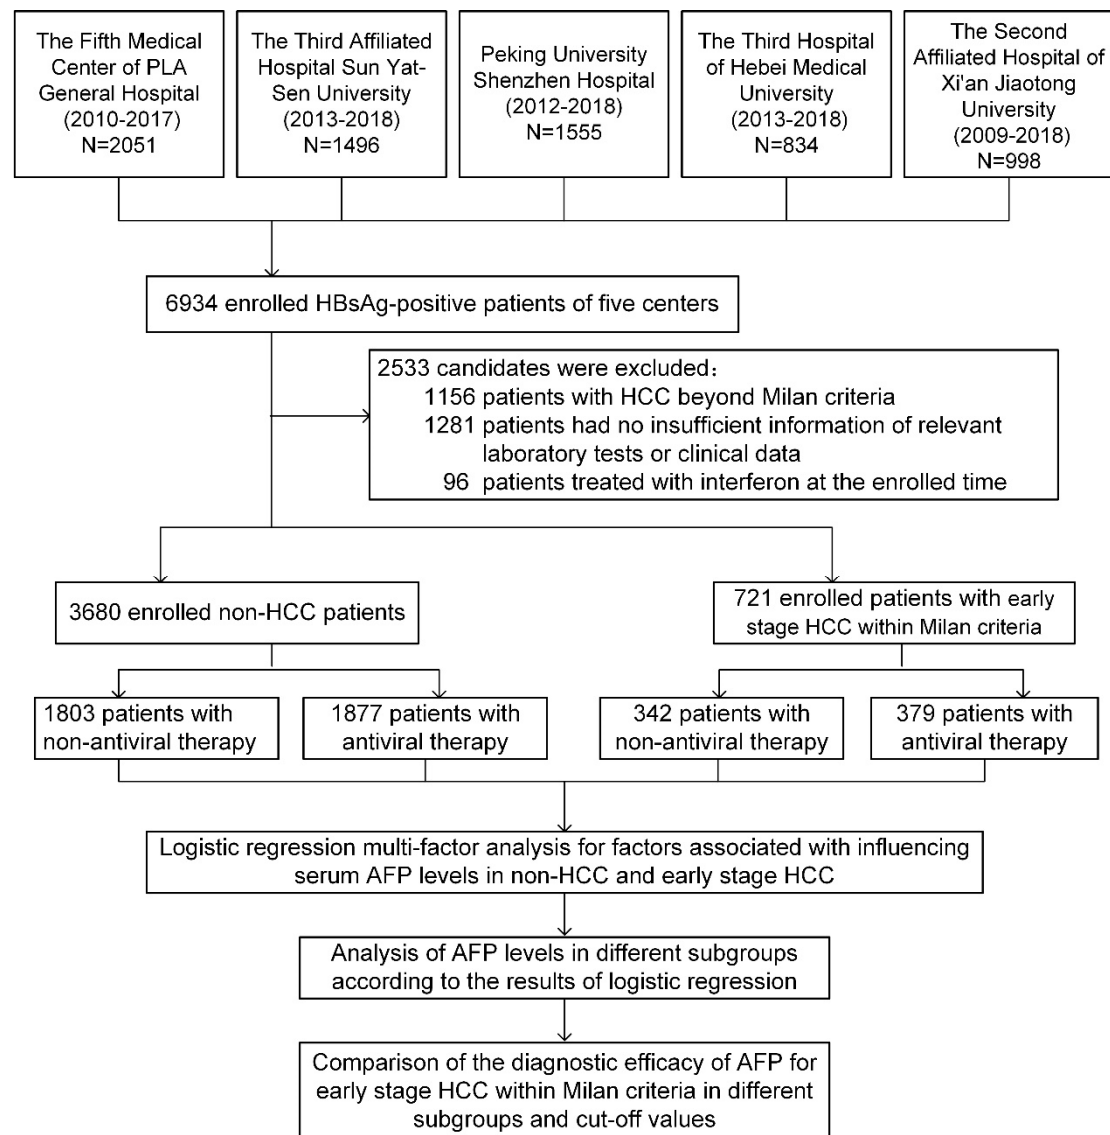

**Supplementary Figure S1. The distribution and analysis process of patients enrolled in this study.**

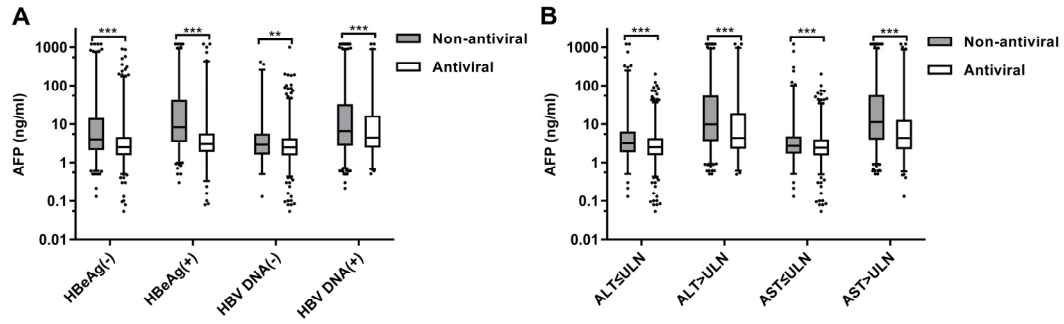

**Supplementary Figure S2. Comparisons of serum AFP levels between non-HCC patients with and without antiviral treatment in different subgroups. (A) Subgroups of HBeAg(-), HBeAg(+), HBV DNA (-) and HBV DNA(+); (B) Subgroups of ALT  $\leq$  1 $\times$ ULN, ALT > 1 $\times$ ULN, AST  $\leq$  1 $\times$ ULN and AST > 1 $\times$ ULN. \*\* $P$  < 0.01, \*\*\* $P$  < 0.001.**

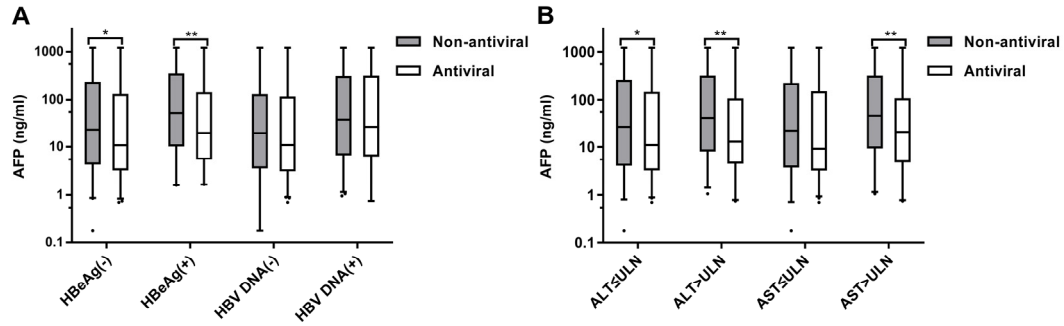

**Supplementary Figure S3. Comparisons of serum AFP levels between early stage HCC patients with and without antiviral treatment in different subgroups. (A) Subgroups of HBeAg (-), HBeAg (+), HBV DNA (-) and HBV DNA (+); (B) Subgroups of ALT  $\leq$  1 $\times$ ULN, ALT > 1 $\times$ ULN, AST  $\leq$  1 $\times$ ULN and AST > 1 $\times$ ULN. \* $P$  < 0.05, \*\* $P$  < 0.01.**

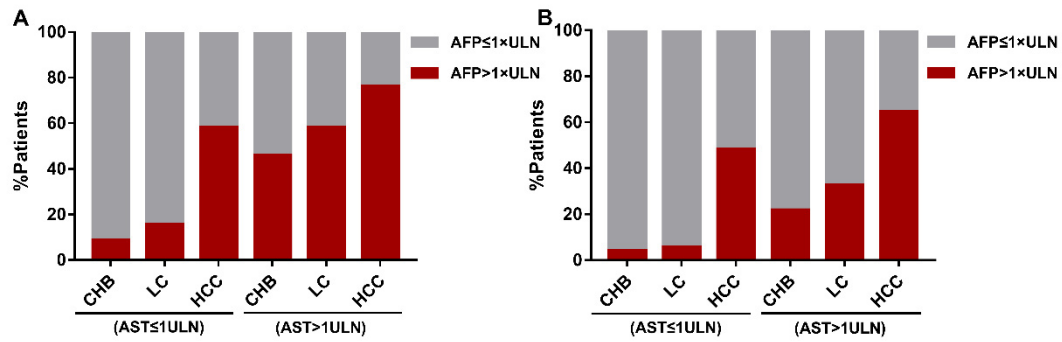

**Supplementary Figure S4. Proportions of abnormal AFP levels between  $AST \leq 1 \times ULN$  and  $AST > 1 \times ULN$  for patients with chronic hepatitis B (CHB), liver cirrhosis (LC) and early stage HCC in (A) the non-antiviral therapy group, (B) the antiviral therapy group.**

**Supplementary Table S1 The normal ranges for AFP, ALT, AST, TBIL, Albumin and Platelet by each clinical center.**

| <b>Variables</b>     | <b>Center A</b> | <b>Center B</b> | <b>Center C</b> | <b>Center D</b> | <b>Center E</b> |
|----------------------|-----------------|-----------------|-----------------|-----------------|-----------------|
| AFP(ng/mL)           | 0~10            | 0~8.1           | 0~13.4          | 0~9             | 0~7.02          |
| ALT(U/L)             |                 |                 |                 |                 |                 |
| Male                 | 5~40            | 3~35            | 9~50            | 9~50            | 9~50            |
| Female               | 5~35            | 3~35            | 7~40            | 7~40            | 7~40            |
| AST(U/L)             |                 |                 |                 |                 |                 |
| Male                 | 8~40            | 15~40           | 15~40           | 15~40           | 15~40           |
| Female               | 8~40            | 13~35           | 13~35           | 13~35           | 13~35           |
| TBIL( $\mu$ mol/L)   | 3.4~20.5        | 4~23.9          | 6.1~25.9        | 3~20            | 5~20            |
| Albumin (g/L)        | 35~55           | 36~51           | 40~55           | 40~55           | 35~55           |
| Platelet( $10^9$ /L) | 85~303          | 100~350         | 125~350         | 125~350         | 100~300         |

Center A: The Fifth Medical Center of Chinese PLA General Hospital; Center B: The Third Affiliated Hospital of Sun Yat-Sen University; Center C: Peking University Shenzhen Hospital; Center D: The Third Hospital of Hebei Medical University; Center E: The Second Affiliated Hospital of Xi'an Jiaotong University; AFP, alpha-fetoprotein; ALT, alanine aminotransferase; AST, aspartate aminotransferase; TBIL, total bilirubin.

**Supplementary Table S2. Performance characteristics of serum AFP discriminating early stage HCC in different subgroups.**

| Variables         | AUC (95%CI)          | Cut-off | Se (%) | Sp (%) | LR+  | LR-  | P-value |
|-------------------|----------------------|---------|--------|--------|------|------|---------|
| Whole cohort      | 0.737 (0.716, 0.758) | 8.30    | 62.69  | 74.37  | 2.45 | 0.50 | -       |
| Antiviral Therapy |                      |         |        |        |      |      | < 0.001 |
| +                 | 0.783 (0.756, 0.811) | 6.33    | 61.74  | 84.02  | 3.86 | 0.46 | -       |
| -                 | 0.701 (0.669, 0.733) | 16.07   | 59.65  | 70.22  | 2.00 | 0.57 | -       |
| HBeAg             |                      |         |        |        |      |      | 0.397   |
| -                 | 0.754 (0.729, 0.779) | 6.90    | 61.40  | 78.37  | 2.84 | 0.49 | -       |
| +                 | 0.734 (0.697, 0.771) | 7.38    | 75.96  | 61.45  | 1.97 | 0.39 | -       |
| HBV DNA           |                      |         |        |        |      |      | < 0.001 |
| -                 | 0.788 (0.759, 0.816) | 7.04    | 56.88  | 89.60  | 5.47 | 0.48 | -       |
| +                 | 0.707 (0.677, 0.738) | 7.99    | 72.59  | 57.29  | 1.70 | 0.48 | -       |
| ALT               |                      |         |        |        |      |      | < 0.001 |
| ≤ 1×ULN           | 0.797 (0.772, 0.823) | 7.73    | 59.96  | 88.83  | 5.37 | 0.45 | -       |
| > 1×ULN           | 0.649 (0.612, 0.686) | 8.60    | 69.69  | 51.85  | 1.45 | 0.58 | -       |
| AST               |                      |         |        |        |      |      | < 0.001 |
| ≤ 1×ULN           | 0.811 (0.786, 0.837) | 6.90    | 59.27  | 90.78  | 6.42 | 0.45 | -       |
| > 1×ULN           | 0.664 (0.628, 0.699) | 10.14   | 70.07  | 55.18  | 1.56 | 0.54 | -       |

AUC, area under the ROC curve; CI, confidence interval; Se, sensitivity; Sp, specificity; LR+, positive likelihood ratio; LR-, negative likelihood ratio; HBeAg, hepatitis B e antigen; ALT, alanine aminotransferase; AST, aspartate aminotransferase; ULN, upper limit of normal.
